# Supplementary material for: Comparative Proteomic Analysis Reveals That the Heterosis of Two Maize Hybrids is Related to Enhancement of Stress Response and Photosynthesis Respectively
Source: Research Square preprint supplement (doi:10.21203/rs.3.rs-29700/v3), 2020-10-27
Supplement: Supplementary file 1 [file 9fc37ba5783e9f81981c22da.xlsx]

## Sheet: Sheet2
Protein IDs	Mol. weight [kDa]	Q-value	Score	LFQ intensity ZD909-1	LFQ intensity ZD909-2	LFQ intensity ZD909-3	LFQ intensity HD568-1	LFQ intensity HD568-2	LFQ intensity HD568-3	LFQ intensity Z58-1	LFQ intensity Z58-2	LFQ intensity Z58-3	p值	909/909M	909/909Fem	分类
tr|A0A1D6FDT0|A0A1D6FDT0_MAIZE	29.87	0	4.1064	132800000	169010000	138210000	222530000	177230000	216870000	1	1	1	0.0301839	0.713588	1.46673e+08	+
tr|A0A1D6M3X8|A0A1D6M3X8_MAIZE	30.036	0	45.581	52161000	58836000	49972000	69567000	57710000	75398000	1	1	1	0.00594149	0.794222	5.36563e+07	+
tr|B4F8E3|B4F8E3_MAIZE	37.057	0	45.226	108070000	105780000	117710000	150490000	105840000	86150000	1	1	90400000	0.0248045	0.968115	3.6677	+
tr|B4FZW5|B4FZW5_MAIZE	37.809	0	13.129	49397000	39206000	53060000	55521000	40532000	39761000	1	1	1	0.00726107	1.04307	47221000	+
tr|C0PHG6|C0PHG6_MAIZE	59.592	0	5.5427	285900000	382390000	333220000	361670000	303300000	281060000	1	1	1	0.00437609	1.05865	3.33837e+08	+
tr|A0A1D6KL28|A0A1D6KL28_MAIZE	19.839	0	15.503	76423000	93036000	81996000	143620000	84092000	1	1	1	75269000	0.0475304	1.10427	3.34075	+
tr|A0A1D6QPU0|A0A1D6QPU0_MAIZE	98.507	0	9.4617	130380000	193960000	147480000	149170000	126240000	131090000	1	1	107010000	0.0484147	1.16069	4.40912	+
tr|B6TNM0|B6TNM0_MAIZE	38.617	0	8.8325	175900000	242250000	204380000	261870000	264620000	1	1	1	177710000	0.0196589	1.18242	3.50307	+
tr|A0A1D6K8P1|A0A1D6K8P1_MAIZE	28.433	0	48.896	700640000	860740000	809070000	739650000	550400000	666710000	480690000	560520000	469680000	0.0132076	1.21142	1.56891	+
tr|A0A1D6GZZ0|A0A1D6GZZ0_MAIZE	113.33	0	29.74	25572000	38666000	40794000	42005000	39079000	1	1	1	35623000	0.0325988	1.29535	2.94843	+
sp|A5H453|PER42_MAIZE	33.011	0	42.483	2908600000	2880300000	3040200000	3009300000	891460000	2277900000	1548600000	2159200000	2135400000	0.0185676	1.42897	1.511	+
tr|A0A1D6L1G6|A0A1D6L1G6_MAIZE	31.115	0	8.0914	526450000	571130000	577010000	483320000	241910000	381610000	310590000	403190000	434660000	0.00429939	1.51295	1.45814	+
sp|P05643|PETD_MAIZE	17.489	0	52.013	2343400000	2300300000	2439100000	1334500000	1585100000	1745600000	2289500000	2276000000	2001000000	0.000790811	1.51822	1.07863	+
tr|B4FRM5|B4FRM5_MAIZE	36.426	0	57.18	751130000	783310000	771820000	550860000	388760000	566290000	678110000	717120000	709210000	0.00346785	1.53147	1.0959	+
tr|B4FK45|B4FK45_MAIZE	38.256	0	147.2	455010000	404530000	455960000	305130000	227460000	326340000	386180000	439150000	354090000	0.00471132	1.53156	1.11538	+
tr|B4FL55|B4FL55_MAIZE	30.183	0	323.31	4575500000	4148200000	4495200000	3021000000	2898200000	2701800000	3220400000	2483000000	5223800000	0.0441184	1.53334	1.20972	+
tr|K7TXI5|K7TXI5_MAIZE	26.586	0	231.54	7389500000	7234200000	8489500000	5143000000	4862000000	4991600000	5717500000	5344400000	7932800000	0.0230953	1.54123	1.21682	+
tr|A0A1D6L0I4|A0A1D6L0I4_MAIZE	53.17	0	93.142	367430000	417960000	452920000	272560000	221510000	308660000	337650000	297150000	338570000	0.0203321	1.54262	1.27219	+
sp|P04967|PSAB_MAIZE	82.656	0	120.48	42152000000	44506000000	45117000000	29323000000	25484000000	29483000000	34744000000	41829000000	33166000000	0.000522825	1.56335	1.2008	+
tr|A0A1D6G801|A0A1D6G801_MAIZE	21.947	0	134.11	1178900000	1075000000	1004500000	865590000	535890000	680690000	1014000000	1082500000	814260000	0.0288152	1.56491	1.11943	+
tr|A0A1D6HT76|A0A1D6HT76_MAIZE	37.269	0	208.71	1377100000	1424700000	1485900000	998260000	728490000	1008600000	1155000000	1135400000	1229800000	0.00396986	1.56751	1.21803	+
tr|B6SZT9|B6SZT9_MAIZE	27.851	0	260.46	14623000000	11529000000	13336000000	8316900000	9189300000	7653600000	9576800000	8880500000	10890000000	0.043727	1.56949	1.34554	+
tr|A0A1D6FKP2|A0A1D6FKP2_MAIZE	48.323	0	138.04	511390000	478250000	528500000	373630000	269440000	314800000	330090000	397430000	286810000	0.00107406	1.58491	1.49669	+
tr|K7TXW7|K7TXW7_MAIZE	18.641	0	320.81	19545000000	18290000000	17313000000	12204000000	9606300000	12886000000	16747000000	16172000000	14094000000	0.00388889	1.58945	1.17304	+
sp|P11601|PSAC_MAIZE	8.9083	0	278.92	35683000000	32044000000	31023000000	22250000000	14288000000	25312000000	36923000000	35651000000	19875000000	0.0446419	1.5966	1.06816	+
tr|A0A1D6IJ76|A0A1D6IJ76_MAIZE	22.798	0	25.24	1306600000	1162400000	1157100000	710710000	675580000	796660000	1297500000	1130100000	1308400000	0.0279989	1.6611	0.970584	+
sp|P04966|PSAA_MAIZE	83.222	0	125.99	23773000000	22932000000	27618000000	15045000000	15055000000	14333000000	19810000000	18667000000	21522000000	0.00751101	1.6727	1.23874	+
tr|K7UGI3|K7UGI3_MAIZE	19.072	0	323.31	4488500000	4104600000	3716600000	2209000000	1878800000	3141500000	4580200000	3965200000	3122800000	0.0218112	1.70275	1.05498	+
tr|B6SUQ7|B6SUQ7_MAIZE	50.515	0	41.9	331940000	345430000	257510000	234120000	129680000	184960000	235420000	246580000	203880000	0.0269047	1.70362	1.36304	+
tr|B6TXZ8|B6TXZ8_MAIZE	53.351	0	170.18	634180000	601560000	622830000	366090000	315760000	396810000	472680000	541280000	666330000	0.0127374	1.72304	1.1061	+
tr|B6TR16|B6TR16_MAIZE	13.653	0	13.589	2280600000	2167400000	2954600000	1514700000	1402700000	1311900000	1844400000	1913800000	1671200000	0.0274547	1.75031	1.36343	+
tr|B6SUC4|B6SUC4_MAIZE	28.984	0	275.6	16250000000	14576000000	16678000000	9370500000	8376600000	9372800000	12329000000	12961000000	11896000000	0.0145739	1.75163	1.27747	+
tr|B4FL09|B4FL09_MAIZE	31.469	0	302.75	23358000000	21843000000	19027000000	13588000000	9727000000	13170000000	22410000000	21885000000	19045000000	0.0297166	1.76039	1.01402	+
tr|B6SP99|B6SP99_MAIZE	51.436	0	176.95	4422800000	3870100000	3815000000	2344100000	2121800000	2349400000	4261400000	3858000000	3973700000	0.0144788	1.77658	1.00122	+
tr|B6SSN3|B6SSN3_MAIZE	26.309	0	82.15	1281200000	1107900000	1487500000	742870000	828480000	583550000	955610000	772660000	1342400000	0.0245332	1.79897	1.26246	+
tr|A0A1D6L6A9|A0A1D6L6A9_MAIZE	37.463	0	174.15	2958500000	2624300000	2490000000	1373900000	1146700000	1780400000	2768000000	2851700000	2469800000	0.0121881	1.87696	0.997936	+
tr|A0A1D6JYG6|A0A1D6JYG6_MAIZE	25.699	0	6.4739	890960000	775310000	1003300000	435900000	463130000	516360000	746700000	573880000	703350000	0.0114231	1.8861	1.319	+
tr|B4FR80|B4FR80_MAIZE	28.414	0	60.148	1221000000	1060300000	1204800000	520880000	514990000	806000000	1266600000	1116800000	843550000	0.00500775	1.8927	1.08031	+
tr|B6T927|B6T927_MAIZE	24.894	0	46.483	947250000	781230000	948950000	422770000	500330000	480530000	895610000	774270000	705810000	0.0111863	1.9075	1.12701	+
sp|P43188|KADC_MAIZE	24.867	0	146.46	2096000000	2457000000	2058700000	1140300000	993340000	1319200000	2640800000	2564300000	1832000000	0.0439894	1.91486	0.939549	+
tr|A0A1D6IDV8|A0A1D6IDV8_MAIZE	45.387	0	58.094	161350000	157950000	128890000	113290000	1	117400000	118700000	175110000	125350000	0.0490844	1.94282	1.06926	+
sp|P05348|RBS_MAIZE	19.151	0	323.31	36705000000	29715000000	29540000000	19022000000	17710000000	12597000000	30933000000	20593000000	28218000000	0.0237811	1.94531	1.20335	+
tr|A0A1D6Q0Q2|A0A1D6Q0Q2_MAIZE	32.665	0	29.444	151730000	139840000	135130000	119950000	81657000	1	1	104820000	188730000	0.00834765	2.11649	1.45359	+
tr|B4FB80|B4FB80_MAIZE	20.974	0	108.92	765190000	603850000	591350000	299960000	215140000	324570000	695850000	663320000	516540000	0.0295659	2.33471	1.04515	+
tr|A0A1X7YHE3|A0A1X7YHE3_MAIZE	61.439	0	59.113	966840000	740930000	751470000	338020000	188100000	290180000	724370000	457760000	592720000	0.0151473	3.01267	1.3856	+
tr|Q1PBH6|Q1PBH6_MAIZE	38.361	0	16.55	140130000	157690000	167040000	110760000	1	1	124050000	105940000	155290000	0.0237964	4.197	1.20655	+
tr|K7U311|K7U311_MAIZE	28.53	0	9.6533	155160000	132710000	113980000	1	1	74312000	160360000	162670000	108030000	0.0160169	5.40761	0.932237	+
sp|P27789|FER5_MAIZE	14.399	0	4.0953	217000000	257330000	189890000	114560000	1	1	133100000	248580000	198890000	0.00765642	5.79801	1.14408	+
tr|B6TLW3|B6TLW3_MAIZE	18.099	0	90.415	136980000	110590000	115740000	1	1	1	157740000	170780000	201720000	0.034411	1.21103e+08	0.68518	+
tr|C4J639|C4J639_MAIZE	31.256	0	101.96	568390000	481910000	514260000	1	1	1	620160000	863500000	793350000	0.0322428	521520000	0.687112	+
tr|Q9M582|Q9M582_MAIZE	31.554	0	66.069	628780000	606470000	475700000	1	1	1	342700000	572450000	595080000	0.00698768	5.70317e+08	1.13291	+
tr|A0A1D6E8G8|A0A1D6E8G8_MAIZE	22.959	0	115.97	1067400000	1432400000	1510900000	1	1	1	1813100000	1783800000	1502800000	0.0285436	1336900000	0.786458	+
tr|A0A096PRE6|A0A096PRE6_MAIZE	40.839	0	65.705	690940000	564580000	613970000	515910000	319820000	384060000	367000000	338980000	427390000	0.00950288	1.53263	1.6495	++
tr|A0A1D6NJT2|A0A1D6NJT2_MAIZE	31.982	0	7.2126	74243000	60947000	57429000	1	1	1	1	1	1	0.000232675	6.42063e+07	6.42063e+07	++
tr|A0A096R6Z8|A0A096R6Z8_MAIZE	73.021	0	128.4	67005000	71051000	82987000	56650000	67041000	1	56604000	1	76449000	0.0223096	1.78706	1.66132	++
tr|A0A1D6KFE1|A0A1D6KFE1_MAIZE	29.896	0	9.5008	68579000	61265000	65392000	70918000	37406000	1	1	69512000	51437000	0.0329124	1.80233	1.6142	++
tr|B6U534|B6U534_MAIZE	15.313	0	18.403	1710400000	1464100000	2069600000	969640000	874080000	884380000	976360000	1131600000	1289300000	0.0153421	1.92225	1.54363	++
tr|B6TWN7|B6TWN7_MAIZE	49.282	0	46.538	101150000	104290000	115550000	90214000	73904000	1	1	92306000	100960000	0.0199617	1.95585	1.66087	++
tr|A0A1D6E957|A0A1D6E957_MAIZE	49.734	0	10.489	110570000	122420000	91628000	89671000	74068000	1	86228000	1	98012000	0.04775	1.98253	1.76193	++
sp|P69388|PSBE_MAIZE	9.4445	0	323.31	11612000000	9510200000	10495000000	6339200000	3184100000	4807400000	7705900000	2860000000	8571200000	0.0249328	2.20626	1.65214	++
tr|A0A1D6QNT2|A0A1D6QNT2_MAIZE	69.902	0	13.987	53263000	66805000	64295000	51926000	30887000	1	1	1	42376000	0.00140367	2.22626	4.35065	++
tr|K7UIX3|K7UIX3_MAIZE	33.61	0	75.289	1082400000	833670000	830830000	596010000	253070000	323750000	439320000	511160000	559920000	0.00706458	2.34211	1.81866	++
tr|B4FRP8|B4FRP8_MAIZE	34.28	0	12.914	2124300000	1894400000	1679500000	1101200000	519890000	588740000	719440000	863520000	1016300000	0.00155161	2.57857	2.19224	++
sp|P19124|NDHJ_MAIZE	18.669	0	21.489	574080000	468560000	594240000	1	326580000	297520000	564100000	1	453970000	0.0201889	2.62278	1.60783	++
tr|B4FIU6|B4FIU6_MAIZE	34.413	0	6.8006	111590000	118590000	110940000	71365000	53614000	1	1	99298000	93304000	0.00809441	2.72942	1.77111	++
tr|A0A1D6I540|A0A1D6I540_MAIZE	41.79	0.000499	3.5082	81867000	83689000	71080000	78985000	1	1	1	1	47599000	0.00889723	2.99596	4.97145	++
tr|A0A1D6IBV1|A0A1D6IBV1_MAIZE	47.114	0	15.546	73386000	83595000	65451000	64670000	1	1	1	70299000	1	0.0142369	3.43949	3.16408	++
tr|B6SZ83|B6SZ83_MAIZE	41.633	0	3.6681	53222000	52703000	62873000	46578000	1	1	1	47252000	1	0.00874211	3.62399	3.57229	++
tr|A0A1D6JYM4|A0A1D6JYM4_MAIZE	33.86	0	9.842	56709000	42910000	37936000	1	1	37541000	1	1	1	0.00924199	3.66413	4.58517e+07	++
tr|B4FR04|B4FR04_MAIZE	22.859	0	16.516	96140000	114250000	80236000	1	1	78530000	80638000	75880000	1	0.0272993	3.70083	1.85682	++
tr|B4FRX0|B4FRX0_MAIZE	27.271	0	8.7512	38807000	49413000	51736000	35547000	1	1	1	1	41356000	0.0111793	3.93721	3.38418	++
tr|A0A1D6II57|A0A1D6II57_MAIZE	34.316	0	7.6864	44103000	47640000	53651000	30180000	1	1	1	42966000	36934000	0.000840628	4.81756	1.8197	++
tr|B6T398|B6T398_MAIZE	32.536	0	3.6188	67078000	60642000	59028000	1	1	1	1	1	39084000	0.0013208	6.22493e+07	4.77812	++
tr|B7ZYV4|B7ZYV4_MAIZE	70.756	0	126.96	1854400000	1478900000	983750000	1	1	1	347990000	591510000	139100000	0.00843234	1.43902e+09	4.00246	++
tr|A0A1R3MU15|A0A1R3MU15_MAIZE	50.918	0	48.362	197380000	190780000	232190000	190790000	207290000	194720000	337450000	320330000	296900000	0.022743	1.04647	0.649799	-
tr|C0PN00|C0PN00_MAIZE	20.606	0	27.841	1	1	1	1	1	1	52494000	26123000	33252000	0.00907246	1	2.68171e-08	-
tr|B6TGD4|B6TGD4_MAIZE	12.387	0	20.793	1	1	1	1	1	1	43237000	45060000	44586000	1.38474e-07	1	2.25763e-08	-
tr|B4FAK2|B4FAK2_MAIZE	58.297	0	4.3147	1	1	1	1	1	1	67253000	58846000	68167000	2.60574e-05	1	1.54427e-08	-
tr|B6UFF4|B6UFF4_MAIZE	11.458	0	5.9512	1	1	1	1	1	1	85073000	75292000	77330000	1.18836e-05	1	1.26212e-08	-
tr|C0P715|C0P715_MAIZE	54.239	0	4.6673	1	1	1	1	1	1	130300000	83846000	71650000	0.00595833	1	1.0497e-08	-
tr|A0A1D6EMF6|A0A1D6EMF6_MAIZE	24.443	0	36.265	1	1	1	1	1	1	120130000	94223000	143340000	0.00109678	1	8.38708e-09	-
tr|B6TB61|B6TB61_MAIZE	42.133	0	40.431	1	1	1	1	1	1	114330000	123130000	133900000	2.58439e-05	1	8.07841e-09	-
tr|C0HGT2|C0HGT2_MAIZE	45.251	0	7.1665	1	1	1	1	1	1	146570000	154340000	123090000	0.000113705	1	7.07547e-09	-
REV__tr|B6SU92|B6SU92_MAIZE	23.558	0.0078351	2.1585	1	1	1	1	1	1	465210000	540650000	550540000	4.28944e-05	1	1.92753e-09	-
tr|A0A1D6NFV3|A0A1D6NFV3_MAIZE	26.475	0	59.461	80568000	80527000	109490000	76787000	104810000	120080000	160980000	141890000	165280000	0.0345258	0.896936	0.577988	-
tr|B4FBC2|B4FBC2_MAIZE	42.965	0	19.048	256470000	347460000	287660000	296150000	380850000	326780000	450900000	438600000	538780000	0.0272067	0.888232	0.62424	-
tr|A0A1D6INP5|A0A1D6INP5_MAIZE	96.908	0	85.145	61824000	1	1	1	71627000	1	186980000	199920000	300640000	0.0166689	0.863138	0.0899206	-
tr|B6TDR5|B6TDR5_MAIZE	49.981	0	108.43	877480000	832190000	959500000	731110000	1579800000	1447100000	1622800000	1445100000	1551500000	0.0119515	0.710262	0.577817	-
tr|B6SNQ7|B6SNQ7_MAIZE	16.892	0	77.39	487080000	593330000	555030000	700580000	1042700000	723390000	625340000	589030000	713840000	0.0262374	0.663015	0.848165	-
tr|B6T2A5|B6T2A5_MAIZE	17.69	0	39.94	1027600000	1295600000	921190000	1510600000	1892700000	1507100000	1324200000	1340400000	1281500000	0.0402209	0.660718	0.822176	-
tr|B4F848|B4F848_MAIZE	25.754	0	186.77	664010000	567500000	580890000	568260000	1206700000	970110000	854000000	654190000	789410000	0.0315489	0.660238	0.788823	-
tr|B4G1Q5|B4G1Q5_MAIZE	24.353	0	97.95	346850000	380720000	313680000	510400000	614120000	455650000	461670000	369100000	420630000	0.00833799	0.658948	0.832068	-
tr|B6UCF0|B6UCF0_MAIZE	24.902	0	82.151	635010000	854780000	809690000	990430000	1295600000	1268800000	939610000	839210000	982000000	0.0249376	0.646861	0.832897	-
tr|B4FNC9|B4FNC9_MAIZE	10.931	0	32.401	141720000	120260000	119750000	157650000	205680000	231350000	127920000	135590000	97283000	0.0450161	0.641908	1.05803	-
tr|A0A1D6GFP8|A0A1D6GFP8_MAIZE	15.12	0	54.704	720180000	898440000	864050000	1036900000	1602600000	1244700000	942110000	790450000	1149700000	0.0270765	0.639172	0.861362	-
tr|A0A1D6MB76|A0A1D6MB76_MAIZE	39.342	0	48.105	224200000	197040000	218570000	399900000	306890000	296700000	154260000	174590000	198320000	0.0394791	0.637585	1.21367	-
tr|C0PHR4|C0PHR4_MAIZE	53.234	0	184.62	1079900000	1272700000	1462200000	1807500000	2474300000	1723100000	1624600000	1294500000	1577100000	0.0214734	0.635281	0.84845	-
tr|A0A1D6H5B6|A0A1D6H5B6_MAIZE	23.723	0	26.971	476050000	639720000	598350000	738800000	986660000	974600000	613030000	551320000	618100000	0.045374	0.634845	0.961665	-
tr|C0PEC4|C0PEC4_MAIZE	34.409	0	50.006	1244700000	1623900000	1497200000	2075500000	2535300000	2307100000	1834800000	1755500000	1425900000	0.0182574	0.631087	0.87034	-
tr|A0A1D6J617|A0A1D6J617_MAIZE	100.07	0	228.93	678870000	743670000	778300000	1011500000	1256400000	1229900000	1059200000	1012200000	820580000	0.00187112	0.629207	0.761015	-
tr|B6UG10|B6UG10_MAIZE	29.723	0	83.104	616970000	713480000	632120000	916200000	1315000000	893620000	687570000	721350000	1021000000	0.0187153	0.628059	0.807669	-
tr|B4FVJ0|B4FVJ0_MAIZE	44.411	0	154.31	1087300000	1217400000	1392000000	1447400000	2558700000	1881400000	1611200000	1357700000	1668400000	0.0266751	0.62789	0.797166	-
tr|A0A1D6L9Y9|A0A1D6L9Y9_MAIZE	27.755	0	124.2	521640000	564700000	485590000	769460000	877850000	856680000	573830000	591240000	470470000	0.00660458	0.62777	0.961108	-
tr|B4FWR7|B4FWR7_MAIZE	23.937	0	100.69	569220000	706200000	594810000	789490000	1222600000	970420000	653340000	568070000	697580000	0.0428145	0.627066	0.974591	-
tr|B6T4R3|B6T4R3_MAIZE	52.087	0	43.434	141600000	142030000	151070000	212380000	240670000	241340000	137340000	123810000	167260000	0.0107513	0.626017	1.01468	-
sp|Q08069|RS8_MAIZE	25.056	0	108.27	258290000	295320000	344770000	365520000	608000000	469940000	415550000	294740000	485640000	0.0175005	0.62238	0.751198	-
tr|B6T522|B6T522_MAIZE	16.359	0	125.41	786170000	898410000	941950000	1211500000	1632600000	1379400000	844300000	1012500000	1163000000	0.0313515	0.621885	0.86977	-
tr|C0HIC4|C0HIC4_MAIZE	8.8778	0	62.581	273570000	302150000	336550000	434050000	515670000	519570000	412790000	362590000	275480000	0.0060898	0.620892	0.868118	-
tr|B4G1J8|B4G1J8_MAIZE	27.867	0	78.511	664780000	812800000	805280000	1018900000	1415900000	1243000000	816140000	722230000	947340000	0.0221754	0.620713	0.918394	-
tr|B6SHZ1|B6SHZ1_MAIZE	22.366	0	92.826	696700000	780800000	734630000	1027500000	1430100000	1111500000	801200000	1024800000	965990000	0.0266221	0.619801	0.792313	-
tr|A0A1D6MJB1|A0A1D6MJB1_MAIZE	85.617	0	161.25	623360000	611660000	792050000	961370000	1235600000	1082700000	767810000	631600000	615620000	0.031649	0.618071	1.00598	-
tr|B6SIS5|B6SIS5_MAIZE	24.55	0	64.504	207860000	244970000	265560000	311800000	480800000	377220000	249540000	260570000	320490000	0.0423272	0.614103	0.864905	-
tr|B6T7B2|B6T7B2_MAIZE	22.432	0	28.631	303590000	345980000	366860000	468190000	612270000	584020000	348630000	311180000	440300000	0.0258611	0.610659	0.923935	-
tr|A0A1D6M1G1|A0A1D6M1G1_MAIZE	31.997	0	35.704	267130000	365940000	357370000	403110000	698400000	525580000	407880000	405270000	453540000	0.0451465	0.608719	0.781912	-
tr|B6TNR8|B6TNR8_MAIZE	30.357	0	122.36	353130000	441510000	502680000	605870000	903760000	626760000	505190000	453760000	656420000	0.0272622	0.607249	0.80311	-
tr|C0PDB6|C0PDB6_MAIZE	46.133	0	21.303	172600000	155790000	178470000	324800000	299570000	210740000	143010000	169910000	189010000	0.0156312	0.606938	1.00982	-
tr|B4G0E1|B4G0E1_MAIZE	15.072	0	46.28	419480000	515450000	541170000	657110000	941850000	851740000	617840000	636610000	853320000	0.0221828	0.602318	0.700314	-
tr|B4FNT0|B4FNT0_MAIZE	19.496	0	19.167	161660000	191150000	200360000	262580000	380700000	276570000	247730000	174560000	293030000	0.00388868	0.60137	0.773318	-
tr|K7VDJ2|K7VDJ2_MAIZE	16.443	0	54.679	395200000	550710000	553330000	660090000	1017700000	825550000	645590000	579070000	713900000	0.024814	0.598896	0.773378	-
tr|B6T6G1|B6T6G1_MAIZE	17.701	0	34.264	1167100000	1396100000	1387800000	1752700000	2672100000	2273200000	1405200000	1559100000	1715500000	0.0317622	0.589878	0.844267	-
tr|B4FZB4|B4FZB4_MAIZE	22.775	0	6.8075	300960000	411360000	383270000	536480000	641690000	682650000	417570000	393260000	421870000	0.0191763	0.588767	0.888773	-
sp|P27347|MNB1B_MAIZE	17.146	0	66.547	1318400000	1101200000	955840000	1999400000	1688400000	2089600000	1134500000	1000100000	1179100000	0.0465791	0.584249	1.01863	-
tr|C4JBF5|C4JBF5_MAIZE	21.505	0	13.399	405530000	516790000	527980000	695460000	1022600000	775010000	599010000	578180000	662500000	0.0155628	0.581733	0.788339	-
tr|Q6R9D1|Q6R9D1_MAIZE	17.659	0	67.948	580420000	773430000	836120000	1025500000	1539700000	1200600000	837330000	602310000	1140000000	0.0340603	0.581542	0.848944	-
tr|A0A1D6ELG8|A0A1D6ELG8_MAIZE	68	0	54.926	215690000	218040000	258350000	340940000	497840000	357060000	268410000	284980000	326360000	0.0159062	0.57874	0.786678	-
sp|P02355|RR4_MAIZE	23.462	0	21.14	675270000	783880000	642160000	1147400000	1350600000	1138800000	793670000	687590000	802160000	0.003331	0.577791	0.920247	-
sp|Q9TJN6|RR17_MAIZE	14.823	0	82.68	559420000	688310000	574920000	870140000	1165200000	1151300000	894360000	825080000	995540000	0.00544051	0.571966	0.671331	-
tr|B4FD90|B4FD90_MAIZE	16.266	0	14.251	282740000	336490000	327390000	459740000	680260000	517270000	430360000	482360000	356460000	0.0257064	0.571192	0.745852	-
tr|K7VA99|K7VA99_MAIZE	25.749	0	16.689	635280000	682350000	580990000	998730000	1363600000	1023400000	717560000	816350000	888740000	0.0102368	0.560771	0.783696	-
tr|K7W1Y2|K7W1Y2_MAIZE	20.63	0	74.66	475140000	585210000	566560000	848110000	1069200000	984230000	624240000	587350000	740400000	0.00628513	0.560706	0.833462	-
tr|A0A1D6IKI2|A0A1D6IKI2_MAIZE	28.102	0	16.633	1103900000	1159200000	967250000	1012000000	2464400000	2290500000	1630000000	1302400000	1405500000	0.0333224	0.560154	0.744681	-
tr|Q9FYS0|Q9FYS0_MAIZE	28.544	0	256.13	1302300000	1404500000	1142600000	1817100000	3046400000	2013800000	1994800000	1603600000	1669000000	0.0119942	0.559725	0.730797	-
tr|B4FSL2|B4FSL2_MAIZE	12.017	0	83.423	224290000	272330000	258320000	314990000	626170000	418010000	275500000	219570000	337900000	0.0467574	0.555442	0.906323	-
tr|B6TPG2|B6TPG2_MAIZE	17.531	0	15.041	469800000	569820000	540700000	748090000	1262800000	845320000	628810000	588530000	786560000	0.01924	0.553293	0.788622	-
tr|A0A1D6K1B9|A0A1D6K1B9_MAIZE	40.605	0	33.884	241770000	297470000	251720000	509300000	538730000	382410000	479560000	389690000	298620000	0.0277717	0.552949	0.677267	-
tr|A0A1D6KTT8|A0A1D6KTT8_MAIZE	18.764	0	13.784	99208000	114020000	123260000	149590000	275490000	185500000	123910000	100630000	189690000	0.0333757	0.551096	0.812322	-
tr|B4FTJ3|B4FTJ3_MAIZE	21.223	0	42.351	454220000	605690000	399640000	841610000	863780000	963430000	720260000	660120000	353310000	0.0269692	0.54689	0.841875	-
tr|B4FCU1|B4FCU1_MAIZE	15.347	0	17.262	157890000	178030000	197670000	270160000	416310000	328170000	188260000	223690000	250070000	0.0248897	0.525891	0.806003	-
sp|B1P123|BX7_MAIZE	42.13	0	21.982	134590000	149750000	180560000	278240000	368290000	245010000	211760000	137140000	153930000	0.0224663	0.521457	0.924567	-
tr|A0A1D6GVM3|A0A1D6GVM3_MAIZE	46.121	0	145.03	651380000	674290000	600190000	734820000	1672400000	1290400000	1016200000	851750000	917220000	0.0185248	0.520838	0.691469	-
tr|A0A1D6JW41|A0A1D6JW41_MAIZE	13.824	0	41.117	270790000	292100000	377470000	448200000	755260000	630780000	400510000	347230000	386380000	0.021567	0.51267	0.829154	-
tr|A0A1D6FHT8|A0A1D6FHT8_MAIZE	65.975	0	171.7	265100000	358670000	441590000	550540000	917180000	628320000	436010000	437820000	465220000	0.0438127	0.508273	0.795609	-
tr|B4F8D2|B4F8D2_MAIZE	44.45	0	45.22	248910000	338630000	201270000	452230000	685720000	437920000	320180000	319210000	516550000	0.0229226	0.500555	0.682397	-
tr|B4FL64|B4FL64_MAIZE	24.114	0	31.606	316960000	373630000	323580000	513100000	913000000	601850000	381070000	350540000	499700000	0.0219665	0.500096	0.823651	-
tr|A0A1D6HT50|A0A1D6HT50_MAIZE	95.114	0	24.002	139010000	96006000	79454000	197140000	224370000	234500000	173300000	176710000	99625000	0.0170978	0.479368	0.69939	-
tr|Q38JE7|Q38JE7_MAIZE	22.596	0	82.01	203870000	230210000	281030000	516920000	495900000	487510000	196610000	195050000	306400000	0.00963422	0.476635	1.02442	-
tr|C0P5Y3|C0P5Y3_MAIZE	84.491	0	153.3	378080000	387870000	478830000	710520000	1175300000	732450000	601620000	566620000	544980000	0.0194931	0.475421	0.726573	-
sp|P19656|NLTP_MAIZE	11.705	0	323.31	2558200000	2955900000	4605300000	5960500000	8187800000	7276900000	4615600000	3993900000	2947200000	0.0378639	0.472313	0.875631	-
tr|B7ZYW4|B7ZYW4_MAIZE	50.164	0	323.31	1710600000	1962900000	1705400000	2621400000	4691200000	4240700000	2642200000	2028300000	2103700000	0.0057401	0.465573	0.794027	-
tr|B6TL20|B6TL20_MAIZE	25.389	0	18.135	47875000	47257000	60066000	104030000	117230000	113460000	70172000	69792000	67332000	0.00106936	0.463665	0.748678	-
tr|B4F7Y1|B4F7Y1_MAIZE	29.188	0	73.861	224760000	325020000	322400000	472380000	892420000	570490000	393800000	347270000	511060000	0.0191956	0.450671	0.696557	-
tr|A0A1D6L977|A0A1D6L977_MAIZE	64.285	0	18.583	148920000	170090000	184530000	350540000	443440000	330560000	221650000	1	212710000	0.0140684	0.447774	1.15927	-
tr|B4FRC8|B4FRC8_MAIZE	31.606	0	236.41	2093300000	3093600000	3304200000	5789700000	7498600000	5772200000	2451100000	2354600000	2159500000	0.0343484	0.445481	1.21907	-
tr|A0A1D6FKV6|A0A1D6FKV6_MAIZE	62.91	0	59.672	239600000	255450000	167610000	350490000	690390000	564460000	343590000	350840000	246860000	0.0242806	0.412785	0.703991	-
tr|A0A1R3Q5L9|A0A1R3Q5L9_MAIZE	41.214	0	3.8853	1	1	1	29161000	27058000	31263000	1	1	1	1.78099e-05	3.42928e-08	1	-
tr|A0A1D6IZ12|A0A1D6IZ12_MAIZE	37.247	0	8.9606	1	1	1	36801000	24259000	27120000	1	1	1	0.00149668	3.40213e-08	1	-
tr|A0A1D6F4G1|A0A1D6F4G1_MAIZE	23.408	0	4.3359	1	1	1	24097000	36190000	30323000	1	1	1	0.000982264	3.31089e-08	1	-
tr|K7ULJ5|K7ULJ5_MAIZE	44.91	0	6.9173	1	1	1	41065000	42588000	42860000	1	1	1	1.84428e-07	2.3713e-08	1	-
tr|B4FIB2|B4FIB2_MAIZE	23.965	0	11.684	1	1	1	37214000	60166000	40402000	1	1	1	0.00306478	2.17735e-08	1	-
tr|A0A1D6MQ48|A0A1D6MQ48_MAIZE	20.078	0.00095238	3.1087	1	1	1	54522000	47299000	50161000	1	1	1	1.75145e-05	1.97392e-08	1	-
tr|A0A1D6FVH4|A0A1D6FVH4_MAIZE	20.071	0	4.1067	1	1	1	51359000	41894000	66545000	1	1	1	0.00176169	1.87737e-08	1	-
tr|A0A1D6L6N3|A0A1D6L6N3_MAIZE	48.685	0	25.057	1	1	1	55989000	68195000	75586000	1	1	1	0.000309881	1.50173e-08	1	-
tr|B6SUH9|B6SUH9_MAIZE	27.247	0	7.4967	1	1	1	58620000	79650000	67871000	1	1	1	0.000350569	1.45531e-08	1	-
tr|B6TD54|B6TD54_MAIZE	46.635	0	9.298	1	1	1	66793000	90391000	58878000	1	1	1	0.00160103	1.38849e-08	1	-
tr|A0A1D6QHD5|A0A1D6QHD5_MAIZE	107.93	0	11.779	1	1	1	75248000	71467000	69698000	1	1	1	1.58513e-06	1.38624e-08	1	-
tr|B6SQH6|B6SQH6_MAIZE	8.2346	0	33.965	1	1	1	83044000	62197000	72390000	1	1	1	0.000271667	1.37848e-08	1	-
tr|Q5EUD7|Q5EUD7_MAIZE	40.122	0	4.2097	1	1	1	68630000	75972000	75291000	1	1	1	6.21242e-06	1.3643e-08	1	-
tr|C4IYM7|C4IYM7_MAIZE	29.183	0	15.584	1	1	1	95647000	74056000	80942000	1	1	1	0.000194832	1.19691e-08	1	-
tr|B4FKD5|B4FKD5_MAIZE	26.514	0	4.9938	1	1	1	86773000	86237000	78092000	1	1	1	7.5499e-06	1.19473e-08	1	-
tr|B6U9S6|B6U9S6_MAIZE	27.371	0	17.278	1	1	1	87571000	121810000	92650000	1	1	1	0.000702898	9.93276e-09	1	-
tr|A0A1D6I1V6|A0A1D6I1V6_MAIZE	89.394	0	9.775	1	1	1	110940000	115790000	90879000	1	1	1	0.000156008	9.44558e-09	1	-
tr|B8A2L1|B8A2L1_MAIZE	46.765	0	24.203	1	1	1	115350000	108950000	143260000	1	1	1	0.000312232	8.16193e-09	1	-
tr|A0A1D6IP54|A0A1D6IP54_MAIZE	49.434	0	14.661	1	1	1	122440000	121810000	124280000	1	1	1	7.94159e-09	8.14045e-09	1	-
tr|B4F9G6|B4F9G6_MAIZE	24.242	0	6.9727	1	1	1	107500000	133070000	139210000	1	1	1	0.00019976	7.89931e-09	1	-
tr|Q546I4|Q546I4_MAIZE	49.624	0	48.988	1	1	1	82839000	203820000	119910000	1	1	1	0.0193182	7.37882e-09	1	-
tr|A0A096QB26|A0A096QB26_MAIZE	28.417	0	10.794	1	1	1	135390000	153470000	153140000	1	1	1	1.60254e-05	6.78733e-09	1	-
tr|A0A1D6QKN2|A0A1D6QKN2_MAIZE	13.408	0	8.4449	1	1	1	187320000	255820000	195480000	1	1	1	0.000594856	4.69763e-09	1	-
tr|A0A1D6KA25|A0A1D6KA25_MAIZE	28.469	0	17.275	1	1	1	202590000	240500000	269220000	1	1	1	0.000250544	4.21165e-09	1	-
tr|B6TV55|B6TV55_MAIZE	32.09	0	7.8657	1	1	1	195090000	273070000	254220000	1	1	1	0.000510607	4.15294e-09	1	-
tr|A0A1D6PN67|A0A1D6PN67_MAIZE	147.38	0	3.7037	1	1	1	270580000	283480000	184380000	1	1	1	0.00138016	4.06262e-09	1	-
tr|C4J5Y0|C4J5Y0_MAIZE	55.699	0	92.574	1	1	1	421350000	564280000	323580000	1	1	1	0.00335302	2.29146e-09	1	-
tr|A0A1D6L2U8|A0A1D6L2U8_MAIZE	45.904	0	166.3	1	1	1	262220000	878290000	598620000	1	1	1	0.0312262	1.725e-09	1	-
tr|B6SX73|B6SX73_MAIZE	14.3	0	11.533	69241000	76763000	120940000	125670000	266800000	167720000	126160000	77730000	220640000	0.0435127	0.476524	0.628799	--
tr|B6TGT0|B6TGT0_MAIZE	28.219	0	63.723	220050000	231550000	341210000	411390000	802660000	464730000	407560000	315460000	637100000	0.0174814	0.472254	0.582897	--
tr|B6TDR4|B6TDR4_MAIZE	42.326	0	323.31	1150700000	1449500000	1414900000	1147600000	4365800000	3135100000	2455500000	2018900000	2372900000	0.0418092	0.464254	0.586377	--
tr|B4FZP0|B4FZP0_MAIZE	45.874	0	223.4	970250000	953440000	743990000	1179600000	2510300000	2217900000	2143700000	1321800000	1283600000	0.00104392	0.451552	0.561723	--
tr|A0A096RRR4|A0A096RRR4_MAIZE	40.456	0	20.032	263450000	317380000	327570000	598080000	932320000	543470000	425130000	458570000	622490000	0.00675498	0.438022	0.603111	--
tr|A0A1D6H1H6|A0A1D6H1H6_MAIZE	37.466	0	111.08	353210000	529980000	545400000	720460000	1466900000	1275100000	973260000	731880000	838410000	0.00618501	0.412594	0.561652	--
tr|A0A1D6PW12|A0A1D6PW12_MAIZE	10.503	0	21.416	155810000	223860000	104730000	336740000	546620000	315950000	272350000	199490000	256760000	0.021214	0.403899	0.664837	--
tr|A0A1D6EDU5|A0A1D6EDU5_MAIZE	242.43	0	60.504	138820000	279480000	316460000	406960000	904760000	552080000	453450000	348950000	505360000	0.0224165	0.394227	0.561846	--
tr|Q42420|Q42420_MAIZE	7.6046	0	31.274	34408000	1	1	48821000	55170000	1	40044000	35518000	104280000	0.0377842	0.330875	0.191324	--
tr|B6SGX0|B6SGX0_MAIZE	12.59	0	9.0375	215270000	247790000	1	376680000	649230000	404200000	312800000	220570000	342220000	0.0489054	0.323793	0.528855	--
tr|A0A1D6DW07|A0A1D6DW07_MAIZE	64.795	0	55.702	63448000	1	1	73468000	75689000	72712000	77970000	78019000	114220000	0.0499475	0.285971	0.234811	--
tr|A0A1D6GZ86|A0A1D6GZ86_MAIZE	48.432	0	67.086	1	1	145920000	145540000	214000000	186940000	263370000	247150000	221180000	0.0292129	0.267018	0.199426	--
tr|A0A1D6PP96|A0A1D6PP96_MAIZE	44.648	0	22.98	1	1	57629000	83495000	98262000	132630000	94011000	70416000	98474000	0.0232837	0.183306	0.219204	--
tr|B4FJ27|B4FJ27_MAIZE	15.733	0	19.335	241580000	1	1	299630000	603780000	443080000	233630000	214510000	295810000	0.0422821	0.179415	0.324726	--
tr|A0A1D6FAV8|A0A1D6FAV8_MAIZE	54.557	0	83.394	1	70960000	1	1	292240000	121730000	153520000	1	97637000	0.0481528	0.171413	0.282532	--
tr|A0A1D6FNK4|A0A1D6FNK4_MAIZE	14.062	0	44.13	107600000	1	1	135650000	262680000	230010000	147700000	116370000	173990000	0.0244525	0.171245	0.245628	--
tr|K7USR3|K7USR3_MAIZE	47.22	0	56.961	1	1	233430000	239050000	699380000	534770000	338480000	307930000	324670000	0.0301812	0.158451	0.240382	--
tr|B6SSH9|B6SSH9_MAIZE	27.642	0	238.57	120650000	195050000	591760000	2013400000	4508500000	2037600000	862980000	486180000	373330000	0.0290664	0.106018	0.52683	--
tr|B4FM15|B4FM15_MAIZE	16.339	0	36.723	54307000	1	1	139940000	219350000	156640000	89314000	80669000	172610000	0.00592874	0.10526	0.158518	--
tr|C0PCX3|C0PCX3_MAIZE	46.146	0	8.7712	1	1	1	1	38957000	1	38219000	1	32171000	7.09288e-05	7.7008e-08	4.26197e-08	--
tr|C4J692|C4J692_MAIZE	73.855	0	5.7242	1	1	1	49388000	1	1	1	68175000	63561000	0.000435245	6.07435e-08	2.27728e-08	--
tr|A0A1D6L6D5|A0A1D6L6D5_MAIZE	24.491	0	97.866	1	1	1	49527000	1	1	260770000	267740000	270920000	3.23236e-05	6.0573e-08	3.75267e-09	--
tr|A0A1D6EAC4|A0A1D6EAC4_MAIZE	30.541	0	7.9649	1	1	1	39494000	28261000	1	57979000	67492000	46838000	0.00851791	4.42772e-08	1.74106e-08	--
tr|K7V2Q9|K7V2Q9_MAIZE	32.462	0	5.6278	1	1	1	69908000	1	1	1	57325000	86591000	0.00109469	4.29135e-08	2.08455e-08	--
tr|A0A1D6IKW9|A0A1D6IKW9_MAIZE	117.57	0	10.7	1	1	1	24324000	22653000	24147000	1	1	20970000	0.0131739	4.21799e-08	1.43062e-07	--
tr|A0A1D6MPP0|A0A1D6MPP0_MAIZE	37.086	0	12.266	1	1	1	28439000	46515000	1	23674000	1	24479000	0.00824844	4.00245e-08	6.23014e-08	--
tr|B7ZY93|B7ZY93_MAIZE	34.806	0	17.762	1	1	1	48897000	1	30282000	1	33018000	1	0.00298292	3.78888e-08	9.08595e-08	--
tr|A0A1D6JZD6|A0A1D6JZD6_MAIZE	64.581	0	73.736	1	1	1	30101000	56376000	1	1	31278000	70234000	0.021252	3.46913e-08	2.95532e-08	--
tr|B6SHX4|B6SHX4_MAIZE	13.354	0	10.569	1	1	1	28619000	34247000	27829000	30508000	1	32925000	0.00390702	3.30779e-08	4.7294e-08	--
tr|Q9LDA2|Q9LDA2_MAIZE	25.432	0.0042052	2.2598	1	1	1	31223000	31699000	31747000	1	25987000	1	0.00999827	3.16894e-08	1.15442e-07	--
tr|A0A1D6JVU2|A0A1D6JVU2_MAIZE	63.523	0	12.533	1	1	1	1	60443000	37833000	56281000	52037000	58884000	0.006139	3.05263e-08	1.79424e-08	--
tr|B4FRI1|B4FRI1_MAIZE	44.868	0	9.406	1	1	1	1	98475000	1	45376000	1	52321000	0.017186	3.04646e-08	3.07072e-08	--
tr|B4FTE5|B4FTE5_MAIZE	68.385	0	19.403	1	1	1	33790000	32709000	32049000	31070000	1	1	0.0162655	3.0442e-08	9.65562e-08	--
tr|A0A1D6JKW7|A0A1D6JKW7_MAIZE	20.044	0	17.975	1	1	1	1	61210000	42050000	41561000	37396000	36854000	0.0120114	2.90529e-08	2.59043e-08	--
tr|C4IYY6|C4IYY6_MAIZE	11.353	0	34.59	1	1	1	1	106230000	1	53976000	1	66966000	0.00851696	2.82406e-08	2.48053e-08	--
tr|A0A1D6PJL0|A0A1D6PJL0_MAIZE	106.79	0	21.493	1	1	1	52844000	58985000	1	1	1	54072000	7.88797e-06	2.68267e-08	5.54816e-08	--
tr|A0A1D6GDM6|A0A1D6GDM6_MAIZE	73.941	0	19.256	1	1	1	1	117030000	1	92110000	100640000	117160000	0.0206655	2.56345e-08	9.68023e-09	--
tr|B4F8N3|B4F8N3_MAIZE	84.547	0	11.543	1	1	1	39324000	48313000	36754000	37243000	1	45086000	0.00269999	2.41175e-08	3.64392e-08	--
tr|A0A1D6PLL5|A0A1D6PLL5_MAIZE	27.247	0	5.1885	1	1	1	45964000	41626000	41432000	35656000	36010000	32653000	3.65877e-06	2.32518e-08	2.87579e-08	--
tr|A0A1D6ILT1|A0A1D6ILT1_MAIZE	101.57	0	6.6236	1	1	1	41979000	48988000	47444000	1	1	48709000	0.0214527	2.16746e-08	6.15903e-08	--
tr|A0A1D6DYL0|A0A1D6DYL0_MAIZE	20.091	0	5.4566	1	1	1	1	70143000	71880000	52477000	1	50306000	0.0175399	2.11233e-08	2.91877e-08	--
tr|A0A1D6LHQ7|A0A1D6LHQ7_MAIZE	14.925	0	7.4894	1	1	1	1	143180000	1	123760000	104120000	165580000	0.00786799	2.09526e-08	7.62466e-09	--
tr|A0A1D6GZH8|A0A1D6GZH8_MAIZE	84.609	0	26.345	1	1	1	88451000	56015000	1	1	48455000	63756000	0.00194638	2.07661e-08	2.67353e-08	--
tr|B4FBV8|B4FBV8_MAIZE	31.662	0	90.36	1	1	1	46286000	51830000	52537000	1	37616000	1	0.00958773	1.99133e-08	7.97533e-08	--
tr|A0A1D6PYC3|A0A1D6PYC3_MAIZE	19.206	0	5.5871	1	1	1	59261000	94836000	1	50974000	35119000	58417000	0.00954796	1.94683e-08	2.07598e-08	--
tr|K7UMB3|K7UMB3_MAIZE	59.737	0	25.253	1	1	1	46728000	109650000	1	1	1	93226000	0.0115509	1.91843e-08	3.21799e-08	--
tr|B4FB55|B4FB55_MAIZE	23.882	0.0039029	2.4493	1	1	1	66125000	93431000	1	1	1	70949000	0.00079797	1.88022e-08	4.22839e-08	--
tr|B4FBK3|B4FBK3_MAIZE	46.582	0	8.8801	1	1	1	87855000	77534000	1	1	1	62295000	0.000515979	1.81391e-08	4.8158e-08	--
tr|B4FR28|B4FR28_MAIZE	31.249	0	68.701	1	1	1	1	106150000	75541000	63113000	1	66266000	0.0103565	1.65115e-08	2.31877e-08	--
tr|B6SR38|B6SR38_MAIZE	19.336	0.0042589	2.3224	1	1	1	1	1	195130000	221210000	241650000	1	8.30561e-05	1.53744e-08	6.48144e-09	--
tr|B6TIP7|B6TIP7_MAIZE	23.078	0	6.7329	1	1	1	63021000	58670000	73950000	1	41969000	1	0.00209056	1.53342e-08	7.14813e-08	--
tr|K7UV01|K7UV01_MAIZE	19.084	0	29.529	1	1	1	1	197910000	1	171550000	1	367470000	0.0161091	1.51584e-08	5.56566e-09	--
tr|B4FGF5|B4FGF5_MAIZE	28.756	0	14.177	1	1	1	62651000	73035000	66415000	51291000	58930000	1	0.00598588	1.48441e-08	2.7218e-08	--
tr|A0A1D6PCL4|A0A1D6PCL4_MAIZE	18.833	0	6.7538	1	1	1	65243000	78256000	60739000	1	47534000	86755000	0.0101441	1.46887e-08	2.23399e-08	--
tr|A0A1D6L885|A0A1D6L885_MAIZE	20.549	0	35.75	1	1	1	59392000	81908000	64777000	55454000	1	1	0.00404373	1.45577e-08	5.40989e-08	--
tr|B6TL41|B6TL41_MAIZE	23.962	0	7.4253	1	1	1	109560000	105260000	1	1	1	67930000	0.00204567	1.39652e-08	4.41631e-08	--
tr|A0A1D6LQP5|A0A1D6LQP5_MAIZE	89.435	0	4.0877	1	1	1	93214000	123220000	1	1	1	134800000	0.000699807	1.3861e-08	2.22552e-08	--
tr|A0A1D6KDX1|A0A1D6KDX1_MAIZE	33.377	0	16.877	1	1	1	1	138540000	87015000	90420000	1	1	0.00318631	1.33005e-08	3.31785e-08	--
tr|B4FL49|B4FL49_MAIZE	17.74	0	68.752	1	1	1	68434000	73349000	89795000	75353000	68445000	1	0.00210132	1.29546e-08	2.08626e-08	--
tr|C0PFM8|C0PFM8_MAIZE	35.139	0	13.567	1	1	1	88537000	67025000	78681000	1	62153000	65792000	0.0019382	1.28072e-08	2.34476e-08	--
tr|B6T1R4|B6T1R4_MAIZE	15.136	0	8.4281	1	1	1	93223000	89196000	71058000	55235000	1	64431000	0.00229442	1.18354e-08	2.50698e-08	--
tr|A0A1D6QCG6|A0A1D6QCG6_MAIZE	47.137	0	19.644	1	1	1	78225000	90875000	88235000	1	71449000	50841000	0.00724687	1.1658e-08	2.45319e-08	--
tr|K7VUU0|K7VUU0_MAIZE	46.772	0	26.153	1	1	1	86144000	97921000	91571000	116510000	114670000	137880000	1.04348e-05	1.08839e-08	8.12876e-09	--
tr|B6TAE7|B6TAE7_MAIZE	29.089	0	19.101	1	1	1	110900000	119480000	73424000	73109000	82721000	67958000	0.00061794	9.87479e-09	1.34055e-08	--
tr|A0A1D6HNJ8|A0A1D6HNJ8_MAIZE	34.509	0	55.677	1	1	1	105470000	115470000	83132000	107080000	82466000	82743000	0.000153679	9.86608e-09	1.10177e-08	--
tr|A0A1D6Q7Z7|A0A1D6Q7Z7_MAIZE	23.887	0	103.27	1	1	1	79382000	104110000	120700000	111430000	86659000	103910000	5.69409e-05	9.86219e-09	9.93381e-09	--
tr|K7TSD2|K7TSD2_MAIZE	57.46	0	91.902	1	1	1	160950000	147020000	1	141780000	108160000	170920000	0.00323723	9.74121e-09	7.12826e-09	--
tr|A0A1D6E703|A0A1D6E703_MAIZE	86.463	0	15.339	1	1	1	98360000	110120000	130670000	106880000	84974000	1	0.00162413	8.84564e-09	1.56369e-08	--
tr|B4FNJ6|B4FNJ6_MAIZE	23.82	0	21.206	1	1	1	107390000	122960000	117310000	1	88453000	116700000	0.00913032	8.62912e-09	1.46232e-08	--
tr|A0A1D6IUD8|A0A1D6IUD8_MAIZE	28.597	0	10.661	1	1	1	106670000	133090000	133830000	1	1	78113000	0.00889472	8.03019e-09	3.84059e-08	--
tr|B6SRJ5|B6SRJ5_MAIZE	52.354	0	5.8323	1	1	1	110620000	143070000	121830000	78315000	56479000	81956000	1.49823e-06	7.98892e-09	1.38408e-08	--
tr|B4FQQ1|B4FQQ1_MAIZE	18.888	0	56.848	1	1	1	81611000	153150000	154820000	191490000	1	1	0.00817336	7.70058e-09	1.56666e-08	--
tr|A0A1D6JSS7|A0A1D6JSS7_MAIZE	55.388	0	42.842	1	1	1	163510000	138170000	121600000	93905000	112620000	116400000	1.64659e-06	7.08751e-09	9.29008e-09	--
tr|A0A1D6N9I1|A0A1D6N9I1_MAIZE	57.66	0	6.9907	1	1	1	214830000	1	217150000	242500000	185280000	1	0.0289001	6.94477e-09	7.01295e-09	--
tr|A0A1D6MWV4|A0A1D6MWV4_MAIZE	18.681	0	4.2479	1	1	1	1	212780000	231120000	149280000	151780000	164620000	0.0173481	6.75828e-09	6.44219e-09	--
tr|B4FRQ8|B4FRQ8_MAIZE	46.569	0	46.259	1	1	1	138360000	261620000	178430000	104440000	1	99460000	1.35724e-05	5.18663e-09	1.47131e-08	--
tr|A0A1D6KRE0|A0A1D6KRE0_MAIZE	44.011	0	9.4762	1	1	1	199640000	251800000	226350000	153900000	158790000	1	0.00373663	4.42615e-09	9.59417e-09	--
tr|A0A1D6MV33|A0A1D6MV33_MAIZE	105.47	0	52.964	1	1	1	158630000	392550000	175050000	125900000	160080000	174960000	0.00802245	4.13092e-09	6.50844e-09	--
tr|C0PDS1|C0PDS1_MAIZE	56.633	0	30.859	1	1	1	266830000	254080000	354990000	452700000	390620000	437770000	7.31986e-05	3.42505e-09	2.34176e-09	--
tr|B6T4D2|B6T4D2_MAIZE	10.679	0	20.47	1	1	1	329270000	474000000	322070000	277490000	238170000	338720000	2.67569e-05	2.66586e-09	3.51132e-09	--
tr|C0P7X7|C0P7X7_MAIZE	23.803	0.00049826	3.4887	1	1	1	377710000	496640000	463940000	346240000	1	1	0.00235504	2.24167e-09	8.66451e-09	--
tr|O80413|O80413_MAIZE	38.658	0	6.5119	1	1	1	845050000	886970000	493120000	1	584370000	725850000	0.00292716	1.34823e-09	2.28969e-09	--
